# Supplementary material
Source: Elsevier journal article supplement (https://www.sciencedirect.com/science/article/pii/S0213911116300450)
Supplement: mmc1 [file S0213911116300450:mmc1.docx]

**Apéndice online**

**Tabla I**

Indicadores de la dimensión de actividad económica del índice de equidad de género modificado de las comunidades autónomas de España, ordenadas de menor a la mayor brecha en dicha dimensión en el año 2006. Años 2006, 2011 y 2014

|  | **Tasa de actividada** | | | | | | **Ingresosb** | | | | | |
| --- | --- | --- | --- | --- | --- | --- | --- | --- | --- | --- | --- | --- |
|  | **2006** | | **2011** | | **2014** | | **2006** | | **2011** | | **2014** | |
| **Comunidad autónoma** | **Mujer** | **Hombre** | **Mujer** | **Hombre** | **Mujer** | **Hombre** | **Mujer** | **Hombre** | **Mujer** | **Hombre** | **Mujer** | **Hombre** |
| Canarias | 42,3 | 62,9 | 55,3 | 68,2 | 56,2 | 67,7 | 14840 | 17535 | 17602 | 20987 | 17620 | 20678 |
| Baleares | 49,2 | 68,8 | 57,2 | 69,1 | 62,9 | 71,7 | 15750 | 20018 | 19812 | 23213 | 18998 | 22585 |
| Galicia | 39,6 | 57,0 | 47,8 | 59,7 | 48,8 | 58,6 | 14244 | 19022 | 17691 | 22626 | 17258 | 22523 |
| Navarra | 45,9 | 65,3 | 52,0 | 63,5 | 53,4 | 63,9 | 17750 | 24460 | 19927 | 26982 | 19364 | 27848 |
| Madrid | 49,2 | 68,7 | 56,0 | 69,2 | 59,6 | 71,1 | 19240 | 27042 | 22721 | 29016 | 22959 | 29224 |
| Cataluña | 47,0 | 66,2 | 54,8 | 66,3 | 57,5 | 68,2 | 17178 | 24287 | 21042 | 27601 | 20741 | 27684 |
| País Vasco | 43,7 | 63,1 | 51,1 | 62,2 | 51,7 | 62,2 | 18581 | 25947 | 22706 | 29709 | 22687 | 30313 |
| La Rioja | 44,2 | 65,0 | 51,2 | 63,6 | 54,4 | 66,0 | 14707 | 20271 | 18131 | 23641 | 17436 | 23641 |
| C. Valenciana | 42,1 | 64,0 | 51,3 | 65,1 | 53,4 | 65,0 | 14825 | 20067 | 17777 | 23332 | 17918 | 23651 |
| R. Murcia | 41,1 | 65,2 | 52,8 | 70,5 | 52,1 | 68,1 | 13924 | 18206 | 17838 | 23482 | 16957 | 23428 |
| Extremadura | 31,3 | 56,3 | 43,8 | 61,8 | 47,5 | 63,2 | 13806 | 16646 | 17877 | 20787 | 16305 | 21781 |
| Cantabria | 40,2 | 61,5 | 47,3 | 62,1 | 50,3 | 61,9 | 14419 | 20537 | 17888 | 23925 | 16542 | 23225 |
| Aragón | 41,6 | 63,2 | 49,7 | 63,2 | 53,0 | 65,5 | 14894 | 22030 | 18843 | 25263 | 18702 | 25129 |
| Castilla y León | 36,1 | 58,8 | 45,9 | 60,3 | 48,9 | 61,0 | 14250 | 19873 | 17684 | 23641 | 17429 | 23379 |
| Castilla-La Mancha | 34,4 | 64,3 | 48,0 | 65,0 | 51,0 | 65,7 | 14853 | 18509 | 17913 | 22293 | 17481 | 23317 |
| Asturias | 34,6 | 54,4 | 44,3 | 56,3 | 46,3 | 55,2 | 15357 | 22782 | 18786 | 25171 | 18455 | 25500 |
| Andalucía | 34,7 | 60,2 | 49,2 | 65,7 | 52,8 | 65,8 | 14138 | 19253 | 17871 | 23421 | 17690 | 23565 |

a Los valores están expresados en porcentaje.

bSalario medio per cápita.

**Tabla II**

Indicador de la tasa de matriculación universitaria de la dimensión educación del índice de equidad de género modificado de las comunidades autónomas de España ordenadas, de menor a mayor brecha en la dimensión Educación en el año 2006. Años 2006, 2011 y 2014a

|  | **Universidad** | | | | | |
| --- | --- | --- | --- | --- | --- | --- |
|  | **2006** | | **2011** | | **2014** | |
| **Comunidad autónoma** | **Mujer** | **Hombre** | **Mujer** | **Hombre** | **Mujer** | **Hombre** |
| Cantabria | 2,3 | 2,2 | 2,0 | 2,1 | 2,1 | 2,2 |
| Navarra | 3,4 | 3,0 | 3,1 | 2,8 | 3,0 | 2,8 |
| Madrid | 4,7 | 4,5 | 4,5 | 4,5 | 4,6 | 4,6 |
| País Vasco | 3,5 | 3,0 | 2,9 | 2,6 | 2,9 | 2,8 |
| La Rioja | 2,7 | 2,3 | 2,1 | 1,9 | 1,8 | 1,6 |
| Extremadura | 2,8 | 2,4 | 2,5 | 2,3 | 2,5 | 2,2 |
| Asturias | 3,3 | 2,9 | 2,6 | 2,4 | 2,4 | 2,3 |
| Cataluña | 3,3 | 2,7 | 3,0 | 2,7 | 3,1 | 2,8 |
| Aragón | 3,3 | 2,8 | 2,9 | 2,6 | 3,1 | 2,8 |
| Andalucía | 3,9 | 3,2 | 3,6 | 3,0 | 3,7 | 3,2 |
| R. Murcia | 3,9 | 3,0 | 3,8 | 2,9 | 4,2 | 3,5 |
| Canarias | 3,0 | 2,4 | 2,3 | 1,8 | 2,6 | 2,0 |
| Castilla y León | 4,3 | 3,5 | 1,3 | 1,1 | 1,4 | 1,1 |
| Castilla-La Mancha | 1,9 | 1,5 | 4,9 | 3,7 | 5,3 | 4,3 |
| C. Valenciana | 3,7 | 3,2 | 3,5 | 3,2 | 3,6 | 3,3 |
| Galicia | 3,4 | 2,7 | 2,8 | 2,4 | 2,7 | 2,4 |
| Baleares | 1,8 | 1,2 | 1,8 | 1,2 | 1,6 | 1,2 |

a Los valores están expresados en porcentaje.

**Tabla III**

**Indicadores de cargos técnicos y profesionales, escaños parlamentarios y cargos políticos (consejerías) de la dimensión empoderamiento del índice de equidad de género modificado de las comunidades autónomas de España, ordenadas de menor a mayor brecha en dicha dimensión en el año 2006. Años 2006, 2011 y 2014a**

|  | **Cargos técnicos** | | | | | | **Escaños** | | | | | | **Consejerías** | | | | | |
| --- | --- | --- | --- | --- | --- | --- | --- | --- | --- | --- | --- | --- | --- | --- | --- | --- | --- | --- |
|  | **2006** | | **2011** | | **2014** | | **2006** | | **2011** | | **2014** | | **2006** | | **2011** | | **2014** | |
| **Comunidad autónoma** | **M** | **H** | **M** | **H** | **M** | **H** | **M** | **H** | **M** | **H** | **M** | **H** | **M** | **H** | **M** | **H** | **M** | **H** |
| Castilla-La Mancha | 42 | 58 | 43 | 57 | 44 | 56 | 50 | 50 | 53 | 47 | 42 | 58 | 50 | 50 | 50 | 50 | 50 | 50 |
| País Vasco | 48 | 52 | 48 | 52 | 47 | 53 | 53 | 47 | 47 | 53 | 44 | 56 | 45 | 55 | 55 | 45 | 56 | 44 |
| Andalucía | 42 | 58 | 43 | 57 | 45 | 55 | 42 | 58 | 47 | 53 | 50 | 50 | 57 | 43 | 43 | 57 | 38 | 62 |
| Galicia | 48 | 52 | 47 | 53 | 48 | 52 | 35 | 65 | 49 | 51 | 43 | 57 | 50 | 50 | 13 | 88 | 14 | 86 |
| Baleares | 42 | 58 | 44 | 56 | 47 | 53 | 36 | 64 | 46 | 54 | 47 | 53 | 46 | 54 | 13 | 88 | 40 | 60 |
| Castilla y León | 46 | 54 | 46 | 54 | 48 | 52 | 44 | 56 | 40 | 60 | 42 | 58 | 30 | 70 | 40 | 60 | 56 | 44 |
| Canarias | 46 | 54 | 46 | 54 | 46 | 54 | 42 | 58 | 38 | 62 | 53 | 47 | 30 | 70 | 33 | 67 | 60 | 40 |
| Asturias | 47 | 53 | 48 | 52 | 47 | 53 | 37 | 63 | 40 | 60 | 49 | 51 | 40 | 60 | 30 | 70 | 50 | 50 |
| R. Murcia | 42 | 58 | 43 | 57 | 41 | 59 | 39 | 61 | 38 | 62 | 48 | 52 | 33 | 67 | 11 | 89 | 44 | 56 |
| Cantabria | 46 | 54 | 43 | 57 | 45 | 55 | 43 | 58 | 44 | 56 | 39 | 61 | 30 | 70 | 44 | 56 | 25 | 75 |
| Extremadura | 45 | 55 | 45 | 55 | 43 | 57 | 39 | 61 | 38 | 62 | 40 | 60 | 30 | 70 | 25 | 75 | 50 | 50 |
| La Rioja | 47 | 53 | 43 | 57 | 45 | 55 | 41 | 59 | 42 | 58 | 49 | 51 | 22 | 78 | 13 | 88 | 50 | 50 |
| Madrid | 45 | 55 | 46 | 54 | 47 | 53 | 38 | 62 | 42 | 58 | 36 | 64 | 33 | 67 | 44 | 56 | 67 | 33 |
| Aragón | 44 | 56 | 45 | 55 | 47 | 53 | 37 | 63 | 39 | 61 | 48 | 52 | 30 | 70 | 20 | 80 | 44 | 56 |
| C. Valenciana | 42 | 58 | 44 | 56 | 44 | 56 | 46 | 54 | 41 | 59 | 48 | 52 | 20 | 80 | 36 | 64 | 40 | 60 |
| Cataluña | 44 | 56 | 43 | 57 | 47 | 53 | 34 | 66 | 43 | 57 | 40 | 60 | 31 | 69 | 25 | 75 | 23 | 77 |
| Navarra | 49 | 51 | 47 | 53 | 50 | 50 | 37 | 63 | 36 | 64 | 45 | 55 | 9 | 91 | 44 | 56 | 38 | 63 |

a Los valores están expresados en porcentaje.

**Tabla IV**

Distribución de las comunidades autónomas de España según los valores del índice de equidad de género modificado en 2006, 2011 y 2014. Variación media de la equidad de género de las comunidades autónomas de España entre los años 2006-2011, 2011-2014 y 2006-2014

|  | **Índice de equidad de género modificadob** | | | **Variación media de la equidad de género** | | |
| --- | --- | --- | --- | --- | --- | --- |
| **Comunidad autónomaa** | **2006** | **2011** | **2014** | **2006-2011** | **2011-2014** | **2006-2014** |
| País Vasco | -0,0640 | -0,0417 | -0,0432 | 0,0045 | -0,0005 | 0,0026 |
| Castilla-La Mancha | -0,0709 | -0,0381 | -0,0396 | 0,0066 | -0,0005 | 0,0039 |
| Baleares | -0,0781 | -0,0975 | -0,0383 | -0,0039 | 0,0198 | 0,0050 |
| Andalucía | -0,0805 | -0,0706 | -0,0581 | 0,0020 | 0,0041 | 0,0028 |
| Galicia | -0,0813 | -0,1066 | -0,1328 | -0,0051 | -0,0087 | -0,0064 |
| Canarias | -0,0915 | -0,0780 | 0,0162 | 0,0027 | 0,0206 | 0,0094 |
| R. Murcia | -0,1058 | -0,1326 | -0,0406 | -0,0054 | 0,0307 | 0,0081 |
| Castilla y León | -0,1110 | -0,0834 | -0,0400 | 0,0055 | 0,0145 | 0,0089 |
| Madrid | -0,1152 | -0,0749 | -0,0340 | 0,0081 | 0,0136 | 0,0102 |
| La Rioja | -0,1158 | -0,1207 | -0,0322 | -0,0010 | 0,0295 | 0,0104 |
| Asturias | -0,1169 | -0,1037 | -0,0502 | 0,0026 | 0,0178 | 0,0083 |
| Extremadura | -0,1191 | -0,1103 | -0,0545 | 0,0018 | 0,0186 | 0,0081 |
| Cantabria | -0,1192 | -0,0879 | -0,1216 | 0,0063 | -0,0112 | -0,0003 |
| C. Valenciana | -0,1199 | -0,0857 | -0,0542 | 0,0069 | 0,0105 | 0,0082 |
| Cataluña | -0,1211 | -0,1012 | -0,1165 | 0,0040 | -0,0051 | 0,0006 |
| Aragón | -0,1243 | -0,1164 | -0,0532 | 0,0016 | 0,0211 | 0,0089 |
| Navarra | -0,1410 | -0,0761 | -0,0843 | 0,0130 | -0,0027 | 0,0071 |

a Las comunidades autónomas están ordenadas respecto a los mejores valores de equidad del año 2006.

b Elaboración propia.

**Tabla V**

Distribución de las comunidades autónomas de España según los valores de la brecha de género en actividad económica en 2006, 2011 y 2014. Variación media de la equidad de género en actividad económica de las comunidades autónomas de España entre los años 2006-2011, 2011-2014 y 2006-2014

|  | **Brecha de género en actividad económicab** | | | **Variación media de la equidad de género** | | |
| --- | --- | --- | --- | --- | --- | --- |
| **Comunidad autónomaa** | **2006** | **2011** | **2014** | **2006-2011** | **2011-2014** | **2006-2014** |
| Canarias | -0,1394 | -0,0958 | -0,0867 | 0,009 | 0,003 | 0,007 |
| Baleares | -0,1425 | -0,0868 | -0,0760 | 0,011 | 0,004 | 0,008 |
| Galicia | -0,1620 | -0,1165 | -0,1119 | 0,009 | 0,002 | 0,006 |
| Navarra | -0,1664 | -0,1250 | -0,1348 | 0,008 | -0,003 | 0,004 |
| Madrid | -0,1672 | -0,1135 | -0,1040 | 0,011 | 0,003 | 0,008 |
| Cataluña | -0,1705 | -0,1150 | -0,1141 | 0,011 | 0,000 | 0,007 |
| País Vasco | -0,1733 | -0,1157 | -0,1181 | 0,012 | -0,001 | 0,007 |
| La Rioja | -0,1744 | -0,1201 | -0,1236 | 0,011 | -0,001 | 0,006 |
| C. Valenciana | -0,1781 | -0,1267 | -0,1179 | 0,010 | 0,003 | 0,008 |
| R. Murcia | -0,1798 | -0,1399 | -0,1466 | 0,008 | -0,002 | 0,004 |
| Extremadura | -0,1891 | -0,1224 | -0,1427 | 0,013 | -0,007 | 0,006 |
| Cantabria | -0,1920 | -0,1400 | -0,1357 | 0,010 | 0,001 | 0,007 |
| Aragón | -0,1997 | -0,1327 | -0,1264 | 0,013 | 0,002 | 0,009 |
| Castilla y León | -0,2018 | -0,1401 | -0,1278 | 0,012 | 0,004 | 0,009 |
| Castilla-La Mancha | -0,2067 | -0,1299 | -0,1345 | 0,015 | -0,002 | 0,009 |
| Asturias | -0,2084 | -0,1322 | -0,1236 | 0,015 | 0,003 | 0,011 |
| Andalucía | -0,2111 | -0,1390 | -0,1260 | 0,014 | 0,004 | 0,011 |

a Las comunidades autónomas están ordenadas respecto a los mejores valores de equidad del año 2006.

b Elaboración propia.

**Tabla VI**

Distribución de las comunidades autónomas de España según los valores de la brecha de género en educación en 2006, 2011 y 2014. Variación media de la equidad de género en educación de las comunidades autónomas de España entre los años 2006-2011, 2011-2014 y 2006-2014

|  | **Brecha de género en educaciónb** | | | **Variación media de la equidad de género** | | |
| --- | --- | --- | --- | --- | --- | --- |
| **Comunidad autónomaa** | **2006** | **2011** | **2014** | **2006-2011** | **2011-2014** | **2006-2014** |
| Cantabria | 0,0122 | -0,0041 | 0,0068 | 0,002 | -0,001 | 0,001 |
| Navarra | 0,0179 | 0,0155 | 0,0136 | 0,000 | 0,001 | 0,001 |
| Madrid | 0,0194 | 0,0112 | 0,0155 | 0,002 | -0,001 | 0,000 |
| País Vasco | 0,0218 | 0,0208 | 0,0111 | 0,000 | 0,003 | 0,001 |
| La Rioja | 0,0224 | 0,0195 | 0,0160 | 0,001 | 0,001 | 0,001 |
| Extremadura | 0,0227 | 0,0106 | 0,0138 | 0,002 | -0,001 | 0,001 |
| Asturias | 0,0241 | 0,0162 | 0,0143 | 0,002 | 0,001 | 0,001 |
| Cataluña | 0,0244 | 0,0182 | 0,0191 | 0,001 | 0,000 | 0,001 |
| Aragón | 0,0268 | 0,0196 | 0,0159 | 0,001 | 0,001 | 0,001 |
| Andalucía | 0,0269 | 0,0235 | 0,0197 | 0,001 | 0,001 | 0,001 |
| R. Murcia | 0,0289 | 0,0304 | 0,0200 | 0,000 | 0,003 | 0,001 |
| Canarias | 0,0301 | 0,0291 | 0,0300 | 0,000 | 0,000 | 0,000 |
| Castilla y León | 0,0307 | 0,0186 | 0,0275 | 0,002 | -0,003 | 0,000 |
| Castilla-La Mancha | 0,0323 | 0,0320 | 0,0238 | 0,000 | 0,003 | 0,001 |
| C. Valenciana | 0,0329 | 0,0234 | 0,0186 | 0,002 | 0,002 | 0,002 |
| Galicia | 0,0402 | 0,0294 | 0,0259 | 0,002 | 0,001 | 0,002 |
| Baleares | 0,0415 | 0,0329 | 0,0349 | 0,002 | -0,001 | 0,001 |

a Las comunidades autónomas están ordenadas respecto a los mejores valores de equidad del año 2006.

b Elaboración propia.

**Tabla VII**

Distribución de las comunidades autónomas de España según los valores de la brecha de género en empoderamiento en 2006, 2011 y 2014. Variación media de la equidad de género en empoderamiento de las comunidades autónomas de España entre los años 2006-2011, 2011-2014 y 2006-2014.

|  | **Brecha de género en empoderamientob** | | | **Variación media de la equidad de género** | | |
| --- | --- | --- | --- | --- | --- | --- |
| **Comunidad autónomaa** | **2006** | **2011** | **2014** | **2006-2011** | **2011-2014** | **2006-2014** |
| Castilla-La Mancha | -0,0382 | -0,0165 | -0,0082 | 0,004 | 0,003 | 0,004 |
| País Vasco | -0,0407 | -0,0301 | -0,0227 | 0,002 | 0,002 | 0,002 |
| Andalucía | -0,0572 | -0,0962 | -0,0681 | -0,008 | 0,009 | -0,001 |
| Galicia | -0,1220 | -0,2327 | -0,3122 | -0,022 | -0,027 | -0,024 |
| Baleares | -0,1332 | -0,2388 | -0,0737 | -0,021 | 0,055 | 0,007 |
| Castilla y León | -0,1619 | -0,1286 | -0,0196 | 0,007 | 0,036 | 0,018 |
| Canarias | -0,1651 | -0,1672 | 0,1053 | 0,000 | 0,021 | 0,007 |
| Asturias | -0,1663 | -0,1952 | -0,0413 | -0,006 | 0,051 | 0,016 |
| R. Murcia | -0,1665 | -0,2885 | 0,0047 | -0,024 | 0,095 | 0,020 |
| Cantabria | -0,1777 | -0,1195 | -0,2361 | 0,012 | -0,039 | -0,007 |
| Extremadura | -0,1908 | -0,2190 | -0,0347 | -0,006 | 0,061 | 0,020 |
| La Rioja | -0,1954 | -0,2614 | 0,0109 | -0,013 | 0,084 | 0,023 |
| Madrid | -0,1978 | -0,1223 | -0,0133 | 0,015 | 0,036 | 0,023 |
| Aragón | -0,1999 | -0,2360 | -0,0491 | -0,007 | 0,062 | 0,019 |
| C. Valenciana | -0,2147 | -0,1537 | -0,0634 | 0,012 | 0,030 | 0,019 |
| Cataluña | -0,2173 | -0,2067 | -0,2545 | 0,002 | -0,016 | -0,005 |
| Navarra | -0,2746 | -0,1187 | -0,1317 | 0,031 | -0,004 | 0,018 |

a Las comunidades autónomas están ordenadas respecto a los mejores valores de equidad del año 2006.

b Elaboración propia.
